# Supplementary figures and images for: The non-methylated DNA-binding function of Kaiso is not required in earlyXenopus laevisdevelopment
Source: Oxford University Press journal article supplement (doi:10.1242/dev.025569), 2009-01-22

A

### Overlap between methylated CpG island sequences and Kaiso target sequences

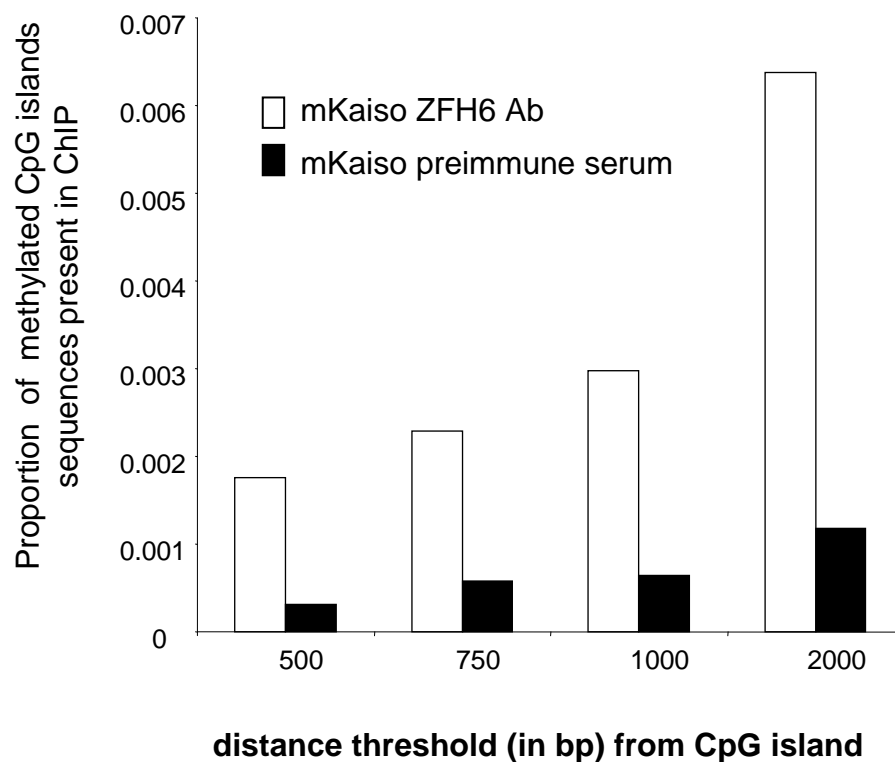

B

Tex19 promoter

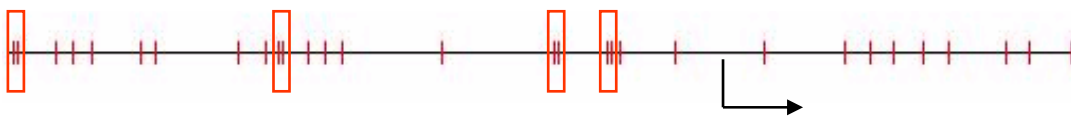

Supplement: dev025569-sup-025569-figs5.pdf [file dev025569-sup-025569-figs5.pdf]
